# Supplementary material for: Is Covid-19 community level testing effective in reaching at-risk populations? Evidence from spatial analysis of New Orleans patient data at walk-up sites
Source: Research Square preprint supplement (doi:10.21203/rs.3.rs-198724/v1), 2021-02-16
Supplement: Supplementary file 2 [file 329aa95b86006264a999f1d7.docx]

Table 1. Residence of persons tested at drive through and walk-up sites in Orleans parish, April – June 2020

| Testing sites | Total | Orleans Parish | Jefferson – St Bernard Parish | Rest of Louisiana | Out of state |
| --- | --- | --- | --- | --- | --- |
| Drive through | 9,729 | 45.8% | 41.2% | 12.0% | 0.9% |
| Walk-up | 9,712 | 78.5% | 15.3% | 2.4% | 3.8% |
