# Supplementary material for: Is Covid-19 community level testing effective in reaching at-risk populations? Evidence from spatial analysis of New Orleans patient data at walk-up sites
Source: Research Square preprint supplement (doi:10.21203/rs.3.rs-198724/v1), 2021-02-16
Supplement: Supplementary file 3 [file dfc3823e4693b86d1c4b7edb.docx]

*Table 2. Demographic of census tracts and their proximity to walk-in testing sites, ACS 2018*

| Demographics of the census tract | Orleans Parish | Walk-up site nearby | | p-value  (t-test) |
| --- | --- | --- | --- | --- |
| No | Yes |
| % Under federal poverty level | 26.1 | 24.1 | 28.0 | 0.111 |
| % White | 36.9 | 44.3 | **29.9***** | 0.003 |
| % African American or Black Hispanic | 57.2 | 50.1 | **64.0***** | 0.006 |
| % Non-Black Hispanic | 5.7 | 5.5 | 5.8 | 0.661 |
| % Asian | 2.4 | 2.1 | 2.6 | 0.520 |
| % Minorities | 63.1 | 55.7 | **70.1***** | 0.003 |

*** p<0.01, ** p<0.05, * p<0.1
