# Supplementary material for: Is Covid-19 community level testing effective in reaching at-risk populations? Evidence from spatial analysis of New Orleans patient data at walk-up sites
Source: Research Square preprint supplement (doi:10.21203/rs.3.rs-198724/v1), 2021-02-16
Supplement: Supplementary file 4 [file 1c10218f080bdd7155832792.docx]

*Table 3. Multivariate regression analyses results*

| Covariates | Distance to nearest site (Km) | Tested at nearest site (y/n) | Distance covered (Km) | Additional distance covered (Km) | Tested positive (y/n) |
| --- | --- | --- | --- | --- | --- |
| Distance to nearest site (Km) | - | -0.0014*** | 1.0227*** | - | - |
|  | - | (0.0002) | (0.0026) | - | - |
| Tested positive | - | 0.0024 | 1.2443*** | 1.3080*** | - |
|  | - | (0.0264) | (0.3166) | (0.3178) | - |
| Male | 1.1697*** | -0.0024 | 0.2081** | 0.2343** | 0.0063** |
|  | (0.3712) | (0.0079) | (0.0941) | (0.0944) | (0.0031) |
| African American or Black Hispanic | -1.1603** | 0.1465*** | -0.8358*** | -0.8623*** | 0.0012 |
|  | (0.4916) | (0.0104) | (0.1246) | (0.1251) | (0.0041) |
| Asian | -2.0179* | 0.5299*** | -3.1700*** | -3.2152*** | -0.0107 |
|  | (1.1722) | (0.0248) | (0.2971) | (0.2982) | (0.0097) |
| Hispanic white | 1.0472 | 0.0300* | 0.7451*** | 0.7579*** | 0.1733*** |
|  | (0.7742) | (0.0170) | (0.2037) | (0.2045) | (0.0064) |
| Native American | -4.0879 | 0.1273 | -3.4612** | -3.5602** | 0.0948* |
|  | (5.9261) | (0.1253) | (1.5020) | (1.5079) | (0.0491) |
| Pacific Islander | -3.9385 | -0.0978 | 4.3046** | 4.2158** | -0.0112 |
|  | (6.7180) | (0.1420) | (1.7024) | (1.7091) | (0.0557) |
| 2 or more races | -1.7008 | 0.2377*** | -1.5963*** | -1.6351*** | 0.0012 |
|  | (1.8819) | (0.0398) | (0.4769) | (0.4788) | (0.0156) |
| Unknown race | -2.5330*** | -0.0101 | -1.6781*** | -1.7360*** | 0.0044 |
|  | (0.5569) | (0.0118) | (0.1413) | (0.1417) | (0.0046) |
| Age | | | | | |
| Age < 15 | -0.3027 | 0.0128 | 0.8140*** | 0.8059*** | 0.0178* |
|  | (1.2176) | (0.0257) | (0.3086) | (0.3098) | (0.0101) |
| Age 15-19 | -0.2634 | -0.0427 | 0.9214** | 0.9139** | 0.0237** |
|  | (1.4246) | (0.0301) | (0.3611) | (0.3625) | (0.0118) |
| Age 20-24 | 3.1275*** | -0.0244 | 0.5111* | 0.5810** | 0.0183* |
|  | (1.1408) | (0.0241) | (0.2892) | (0.2903) | (0.0095) |
| Age 25-29 | -0.0866 | -0.0168 | 0.2460 | 0.2436 | 0.0071 |
|  | (1.0255) | (0.0217) | (0.2599) | (0.2609) | (0.0085) |
| Age 30-34 | -0.7911 | -0.0020 | 0.1355 | 0.1186 | -0.0167** |
|  | (0.9896) | (0.0209) | (0.2508) | (0.2518) | (0.0082) |
| Age 35-39 | -0.7586 | 0.0218 | 0.1209 | 0.1037 | -0.0009 |
|  | (1.0157) | (0.0215) | (0.2574) | (0.2584) | (0.0084) |
| Age 45-49 | -0.4260 | 0.0032 | 0.3175 | 0.3074 | 0.0051 |
|  | (1.1108) | (0.0235) | (0.2815) | (0.2826) | (0.0092) |
| Age 50-54 | -0.3513 | 0.0565** | 0.4611* | 0.4538* | -0.0115 |
|  | (1.0585) | (0.0224) | (0.2682) | (0.2693) | (0.0088) |
| Age 55-59 | 0.2206 | 0.0873*** | -0.0485 | -0.0420 | -0.0228*** |
|  | (1.0161) | (0.0215) | (0.2576) | (0.2586) | (0.0084) |
| Age 60-64 | -0.4720 | 0.0871*** | -0.1538 | -0.1633 | -0.0191** |
|  | (0.9668) | (0.0204) | (0.2451) | (0.2460) | (0.0080) |
| Age 65-69 | -1.8589* | 0.0986*** | -0.0860 | -0.1270 | -0.0202** |
|  | (0.9593) | (0.0203) | (0.2432) | (0.2441) | (0.0080) |
| Age 70-74 | -0.0584 | 0.1322*** | -0.4275* | -0.4279* | -0.0154* |
|  | (1.0031) | (0.0212) | (0.2542) | (0.2552) | (0.0083) |
| Age >74 | -1.7704* | 0.1496*** | -0.4345* | -0.4732* | -0.0244*** |
|  | (0.9956) | (0.0211) | (0.2524) | (0.2534) | (0.0083) |
|  |  |  |  |  |  |
| N | 9,350 | 9,350 | 9,350 | 9,350 | 9,350 |

Standard errors in parentheses

*** p<0.01, ** p<0.05, * p<0.1
